# Supplementary material
Source: HighWire-hosted journal article supplement (https://www.g3journal.org/content/suppl/2014/10/23/g3.114.014704)
Supplement: FigureS3.pdf [file FigureS3.pdf]

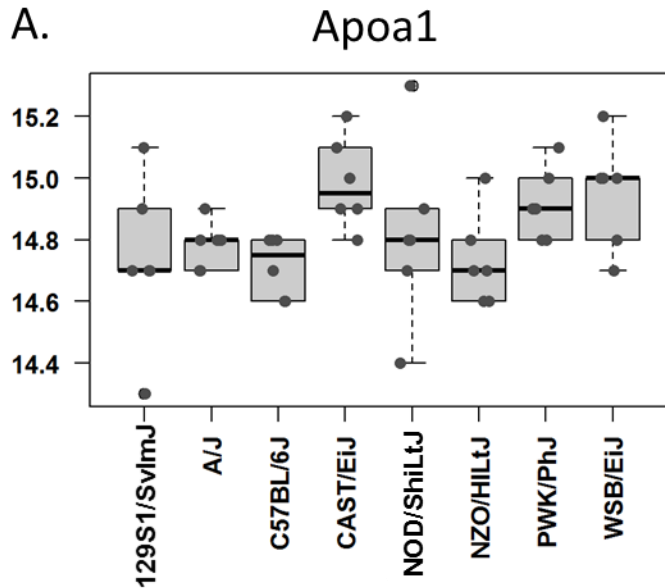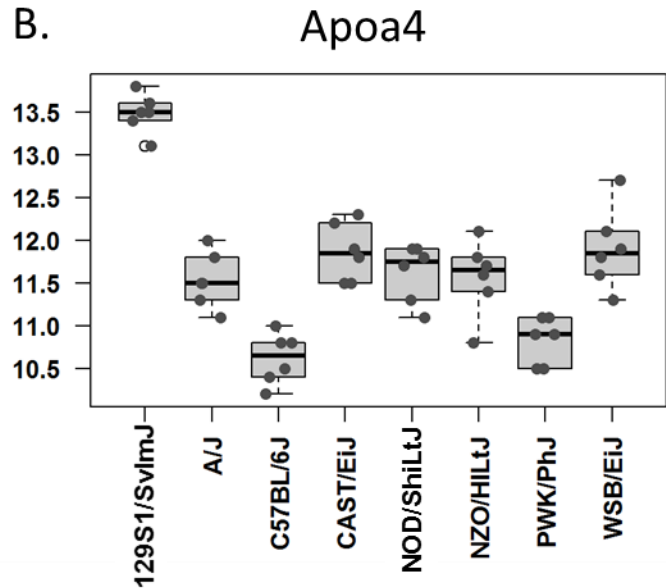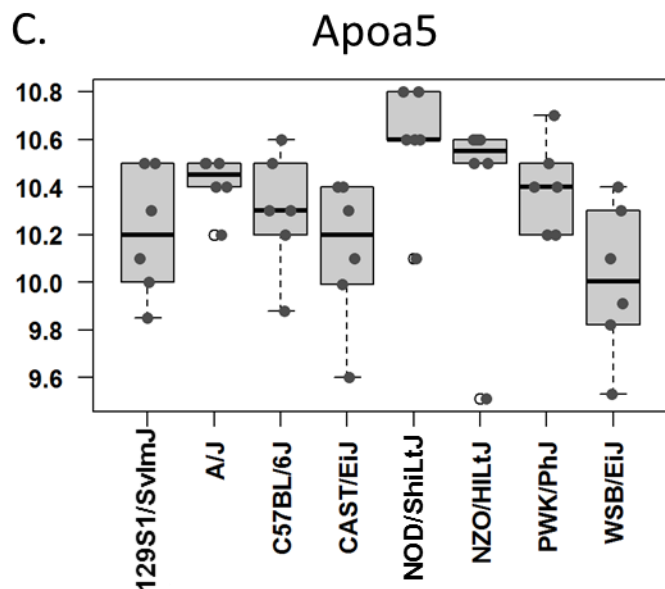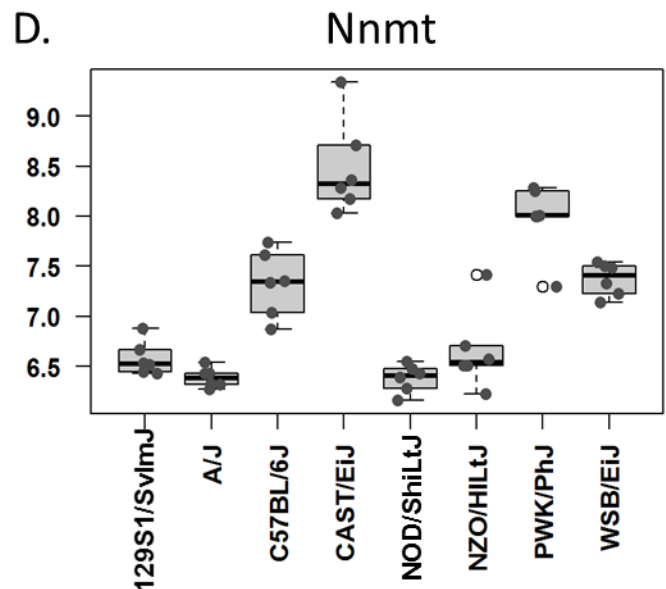

**Figure S3** Liver expression of genes previously associated with markers of cardiovascular disease on Chromosome 9. Gene expression data was obtained from livers of female C57BL6/J, A/J, NOD/ShiLtJ, NZO/HiLtJ, WSB/EiJ, CAST/EiJ, PWK/PhJ and 129S1/SvImJ mice

(<http://cgd.jax.org/gem/strainsurvey26>). Hepatic gene expression of Chromosome 9 genes previously identified as associated with triglyceride levels were compared. Differential expression of genes across the founder strains was determined using a 1-way ANOVA analysis and a Bonferroni correction for multiple tests. *Apoa1* and *Apoa5* were not differentially expressed across the founder strains (A. and C.). *Apoa4* was differentially expressed among the founder strains, but only *Nnmt* was differentially expressed in CAST/EiJ compared to all of the other founder strains (B. and D.).
